# Supplementary material for: Understanding of Colistin Usage in Food Animals and Available Detection Techniques: A Review
Source: PubMed Central journal article supplement (PMC7602861; doi:10.3390/ani10101892), 2020-10-16
Supplement: animals-10-01892-s001.pdf [file animals-10-01892-s001.pdf]

**Table S1.** Antibiogram pattern of pathogenic microbes against colistin isolated from patients

| Types of sample                                                                                                                                                                                                       | Sample Size              | Types of Microbes                                                                                                                                                                                             | Types of Test  | Pattern                                         | Reference |
|-----------------------------------------------------------------------------------------------------------------------------------------------------------------------------------------------------------------------|--------------------------|---------------------------------------------------------------------------------------------------------------------------------------------------------------------------------------------------------------|----------------|-------------------------------------------------|-----------|
| Sputum; nasal; wound; blood; urine;<br>bronchoalveolar lavage                                                                                                                                                         | 16                       | <i>Acinetobacter baumannii</i>                                                                                                                                                                                | MIC            | Resistant (14)                                  | [1]       |
| Blood; bronchial aspirates; cerebrospinal<br>fluids; carriage; wound infections;<br>skin ulcers; catheters; surgical drains;<br>conjunctival exudates; nasal<br>exudates; peritoneal fluid;<br>intraabdominal abscess | 115                      | <i>Acinetobacter baumannii</i>                                                                                                                                                                                | MIC by E-test  | Resistant (22)                                  | [2]       |
| Clinical specimens                                                                                                                                                                                                    | 44                       | <i>Acinetobacter</i> spp.                                                                                                                                                                                     | MIC            | Susceptible (44)                                | [3]       |
| Clinical specimens                                                                                                                                                                                                    | 265                      | <i>Acinetobacter</i> spp.                                                                                                                                                                                     | MIC            | Resistant (48)                                  | [4]       |
| Clinical specimens                                                                                                                                                                                                    | 250, 40, 226,<br>124,36  | <i>Klebsiella pneumonia</i> , <i>Enterobacter</i><br><i>aerogenes</i> , <i>Enterobacter</i> spp.,<br><i>Acinetobacter baumannii</i> ,<br><i>Pseudomonas aeruginosa</i><br><i>Stenotrophomonas maltophilia</i> | MIC by E-test  | Susceptible (187), (33),<br>(216), (115), (41)  | [5]       |
| Cystic fibrosis                                                                                                                                                                                                       | 23                       | <i>Pseudomonas aeruginosa</i>                                                                                                                                                                                 | MIC            | Resistant (13)                                  | [6]       |
| Clinical specimens                                                                                                                                                                                                    | 18, 13, 8, 16,<br>33, 17 | <i>Acinetobacter</i> spp., <i>Escherichia coli</i> ,<br><i>Enterobacter</i> spp., <i>Klebsiella</i><br><i>pneumonia</i> , <i>Stenotrophomonas</i><br><i>maltophilia</i>                                       | MIC            | Susceptible (18), (18), (6),<br>(15), (22), (0) | [7]       |
| Clinical specimens                                                                                                                                                                                                    | 21                       | <i>Klebsiella pneumonia</i>                                                                                                                                                                                   | MIC            | Susceptible (15)                                | [8]       |
| Bacteremia                                                                                                                                                                                                            | 2                        | <i>Escherichia coli</i>                                                                                                                                                                                       | MIC            | Resistant (2)                                   | [9]       |
| Clinical specimens                                                                                                                                                                                                    | 9                        | <i>Escherichia coli</i>                                                                                                                                                                                       | MIC            | Resistant (9)                                   | [10]      |
| Clinical specimens                                                                                                                                                                                                    | 16533, 7446,<br>9786     | <i>Enterobacteriaceae</i> , <i>Acinetobacter</i> spp.,<br><i>Pseudomonas</i> spp.                                                                                                                             | MIC by E-test  | Susceptible (15374),<br>(7344), (9701)          | [11]      |
| Respiratory secretions; wound swabs;<br>blood; urine; body fluid                                                                                                                                                      | 250                      | <i>Acinetobacter</i> spp.                                                                                                                                                                                     | MIC by E-test  | Resistant (30)                                  | [12]      |
| Diarrhea                                                                                                                                                                                                              | 1, 1                     | <i>Klebsiella pneumonia</i> , <i>Escherichia coli</i>                                                                                                                                                         | MIC            | Resistant (1), (1)                              | [13]      |
| Bloodstream infections                                                                                                                                                                                                | 1495, 571                | <i>Escherichia coli</i> , <i>Klebsiella pneumonia</i>                                                                                                                                                         | MIC            | Resistant (20), (1)                             | [14]      |
| Lower respiratory tract infections                                                                                                                                                                                    | 58, 19, 13, 8, 7,<br>4   | <i>Acinetobacter</i> spp., <i>Pseudomonas</i><br><i>aeruginosa</i> , <i>Klebsiella pneumonia</i> ,                                                                                                            | Disc diffusion | Resistant (3), (0), (0), (0),<br>(0), (0)       | [15]      |

## References

1. Li, J.; Rayner, C.R.; Nation, R.L.; Owen, R.J.; Spelman, D.; Tan, K.E.; Liolios, L. **Heteroresistance to colistin in multidrug-resistant *Acinetobacter baumannii***. *Antimicrob Agents Chemother.* 2006, *50*, 2946-2950.
2. Arroyo, L.A.; García-Curiel, A.; Pachón-Ibañez, M.E.; Llanos, A.C.; Ruiz, M.; Pachón, J.; Aznar, J. Reliability of the E-Test Method for Detection of Colistin Resistance in Clinical Isolates of *Acinetobacter baumannii*. *J Clin Microbiol.* 2005, *43*, 903-905.
3. Tan, T.Y.; Ng, L.S.; Poh, K. Susceptibility testing of unconventional antibiotics against multiresistant *Acinetobacter* spp. by agar dilution and Vitek 2. *Diagn Microbiol Infect Dis.* 2007, *58*, 357-361.
4. Ko, K.S.; Suh, J.Y.; Kwon, K.T.; Jung, S.I.; Park, K.H.; Kang, C.I.; Chung, D.R.; Peck, K.R.; Song, J.H. High rates of resistance to colistin and polymyxin B in subgroups of *Acinetobacter baumannii* isolates from Korea. *J Antimicrob Chemother.* 2007, *60*, 63-1167.
5. Galani, I.; Kontopidou, F.; Souli, M.; Rekatsina, P.D.; Koratzanis, E.; Deliolanis, J.; Giamarellou, H. Colistin susceptibility testing by Etest and disk diffusion methods. *Int J Antimicrob Agents.* 2008, *31*, 434-439.
6. Li, J.; Turnidge, J.; Milne, R.; Nation, R.L.; Coulthard, K. **In vitro pharmacodynamic properties of colistin and colistin methanesulfonate against *Pseudomonas aeruginosa* isolates from patients with cystic fibrosis**. *Antimicrob Agents Chemother.* 2001, *45*, 781-785.
7. Tan, T.Y.; Ng, S.Y. The **in-vitro activity of colistin in gram-negative bacteria**. *Singapore Med J.* 2006, *47*, 621-624.
8. Poudyal, A.; Howden, B.P.; Bell, J.M.; Gao, W.; Owen, R.J.; Turnidge, J.D.; Nation, R.L.; Li, J. **In vitro pharmacodynamics of colistin against multidrug-resistant *Klebsiella pneumoniae***. *J Antimicrob Chemother.* 2008, *62*, 1311-1318.
9. Nordmann, P.; Lienhard, R.; Kieffer, N.; Clerc, O.; Poirel, L. **Plasmid-mediated colistin-resistant *Escherichia coli* in bacteremia in Switzerland**. *Clin Infect Dis.* 2016, *62*, 1322-1323.
10. Rapoport, M.; Faccone, D.; Pasteran, F.; Ceriana, P.; Albornoz, E.; Petroni, A.; M.C.R. Group.; Corso, A. First description of *mcr-1*-mediated colistin resistance in human infections caused by *Escherichia coli* in Latin America. *Antimicrob Agents Chemother.* 2016, *60*, 4412-4413.
11. Rossi, F.; Girardello, R.; Cury, A.P.; Di Gioia, T.S.; Almeida, J.N.; Duarte, A.J. Emergence of colistin resistance in the largest university hospital complex of São Paulo, Brazil, over five years. *Braz J Infect Dis.* 2016, *21*, 98-101.
12. Al-Sweih, N.A.; Al-Hubail, M.A.; Rotimi, V.O. Emergence of tigecycline and colistin resistance in *Acinetobacter* species isolated from patients in Kuwait Hospitals. *J Chemother.* 2011, *23*, 13-16.
13. Gu, D.X.; Huang, Y.L.; Ma, J.H.; Zhou, H.W.; Fang, Y.; Cai, J.C.; Hu, Y.Y.; Zhang, R. Detection of colistin resistance gene *mcr-1* in hypervirulent *Klebsiella pneumoniae* and *Escherichia coli* isolates from an infant with diarrhea in China. *Antimicrob Agents Chemother.* 2016, *60*, 5099-5100.
14. Quan, J.; Li, X.; Chen, Y.; Jiang, Y.; Zhou, Z.; Zhang, H.; Sun, L.; Ruan, Z.; Feng, Y.; Akova, M.; Yu, Y. Prevalence of *mcr-1* in *Escherichia coli* and *Klebsiella pneumoniae* recovered from bloodstream infections in China: a multicentre longitudinal study. *Lancet Infect Dis.* 2017, *17*, 400-410.
15. Bhatta, D.R.; Hamal, D.; Shrestha, R.; Supram, H.S.; Joshi, P.; Nayak, N.; Gokhale, S. Burden of multidrug resistant respiratory pathogens in intensive care units of tertiary care hospital. *Asian J Med Sci.* 2019, *10*, 14-19.
